# Supplementary material for: Transcriptome Analysis in the Head Kidney of Rainbow Trout (Oncorhynchus mykiss) Immunized with a Combined Vaccine of Formalin-Inactivated Aeromonas salmonicida and Vibrio anguillarum
Source: MDPI journal article supplement (doi:10.3390/vaccines9111234), 2021-10-22
Supplement: s1 [file s1]

**Table S1. Primers used for Q-PCR.**

| Primer          | Length | Tm (°C) | GC (%) | Size (bp) | Sequence (5'-3')           | Reference     |
|-----------------|--------|---------|--------|-----------|----------------------------|---------------|
| T-bet_F         | 20     | 56.4    | 45     | 124       | TTCTGCCATTTTGTGTCAGG       | [31]          |
| T-bet_R         | 21     | 59.4    | 48     |           | TTCTCCATCCTATTGCTCCAG      |               |
| GATA3_F         | 20     | 58.4    | 50     | 161       | TCCTGGAGAGAGGGATGAAA       |               |
| GATA3_R         | 20     | 60.5    | 55     |           | AGCCCGAGACCTATAGCACA       |               |
| TCR $\alpha$ _F | 25     | 60.9    | 36     | 122       | ACGCACTTGGAAATTATTCAACAAGA |               |
| TCR $\alpha$ _R | 25     | 64.2    | 44     |           | GCTTCACATTTCTCTGAACCACCTA  |               |
| mIgM_F          | 19     | 57.3    | 52.6   | 102       | ATGGAAACCGACAGGGACA        |               |
| mIgM_R          | 19     | 57.3    | 52.6   |           | CACCTTGATGGCAGTTGCT        |               |
| sIgM_F          | 19     | 58.4    | 50     | 110       | GAACCTCAAACCAACCCAAC       |               |
| sIgM_R          | 20     | 58.4    | 50     |           | GTAACACGCAGCAACACACA       |               |
| Hsp70_F         | 20     | 58.4    | 50     | 187       | GTGGAGGAGTTCAAGAGGAA       |               |
| Hsp70_R         | 20     | 62.5    | 60     |           | CCTCAAAACGAGCCCTGGTG       |               |
| C3_F            | 19     | 61.7    | 63     | 164       | GATGGGGACGCTCTGTGTCC       |               |
| C3_R            | 20     | 60.5    | 55     |           | GGGAACTGACTACGAGACAC       |               |
| FN1_F           | 20     | 58.4    | 50     | 108       | TGACAGACCATGGGTAAGGA       |               |
| FN1_R           | 20     | 58.4    | 50     |           | GAATGCCTTCGACCTGAACT       |               |
| CD22_F          | 23     | 66.4    | 57     | 210       | GGCCCAAAGAACACCTCAGTGTC    | In this study |
| CD22_R          | 22     | 62.1    | 50     |           | GGGCCTCACAGTAATATTCTCC     |               |
| ccl19_F         | 20     | 60.5    | 55     | 173       | TTGCTGTCTCCTCACCCTG        |               |
| ccl19_R         | 20     | 60.5    | 55     |           | TGTAGTCTGCCACCCACTTG       |               |
| hamp-1_F        | 20     | 58.4    | 50     | 171       | AGTCCAGTTGGGGAACATCA       |               |
| hamp-1_R        | 20     | 60.5    | 55     |           | GGTTTGTAGTGCAGGCAGGTC      |               |
| NLRC3_F         | 20     | 60.5    | 55     | 171       | GAACGAGGCAGAGAAGGATG       |               |
| NLRC3_R         | 20     | 58.4    | 50     |           | GCCAGCTTTGCCAGTTTAAG       |               |
| DNAJB1_F        | 20     | 58.4    | 50     | 188       | CGTGGTGTTTGTGGTCAAAG       |               |
| DNAJB1_R        | 20     | 58.4    | 50     |           | TACGCTTCTTCATCCCAGGT       |               |
| aste1_F         | 20     | 60.5    | 55     | 175       | TGGTGTGTCCCAGTCCACTA       |               |
| aste1_R         | 20     | 60.5    | 55     |           | CCCTCTTTGGCTCTTCCTCT       |               |

**Table S2.** Summary statistics for the sequencing data on 9 samples.

| Time (day) | Sample <sup>1</sup> | Total Bases <sup>2</sup> (bp) | Raw read <sup>3</sup> | Clean read <sup>4</sup> | GC <sup>5</sup> (%) | AT <sup>6</sup> (%) | Q20 <sup>7</sup> (%) | Q30 <sup>8</sup> (%) |
|------------|---------------------|-------------------------------|-----------------------|-------------------------|---------------------|---------------------|----------------------|----------------------|
| 1          | PBS 1               | 11,755,507,362                | 116,391,162           | 113,451,896 (97.6%)     | 48.80               | 51.20               | 98.44                | 95.44                |
|            | PBS 2               | 7,623,335,368                 | 75,478,568            | 73,385,868 (97.4%)      | 49.58               | 50.42               | 98.30                | 95.12                |
|            | AV                  | 10,267,691,512                | 101,660,312           | 99,256,038 (97.80%)     | 49.44               | 50.56               | 98.49                | 95.51                |
| 3          | PBS 1               | 7,837,444,662                 | 77,598,462            | 75,469,696 (97.5%)      | 49.09               | 50.91               | 98.36                | 95.32                |
|            | PBS 2               | 8,154,824,032                 | 80,740,832            | 78,619,084 (97.5%)      | 48.88               | 51.12               | 98.38                | 95.33                |
|            | AV                  | 10,043,467,270                | 99,440,270            | 96,791,774 (97.50%)     | 49.41               | 50.59               | 98.38                | 95.31                |
| 5          | PBS 1               | 8,916,525,228                 | 88,282,428            | 86,223,008 (97.8%)      | 49.47               | 50.53               | 98.56                | 95.78                |

|       |               |            |                        |       |       |       |       |
|-------|---------------|------------|------------------------|-------|-------|-------|-------|
| PBS 2 | 9,910,185,650 | 98,120,650 | 95,487,188<br>(97.5%)  | 49.0  | 51.0  | 98.37 | 95.30 |
| AV    | 9,145,109,236 | 90,545,636 | 88,224,742<br>(97.60%) | 48.91 | 51.09 | 98.42 | 95.41 |

<sup>1</sup> PBS and AV represent the samples from the PBS or vaccine injection groups, respectively. <sup>2</sup> Total numbers of bases sequenced. <sup>3</sup> Total read counts of raw data. For Illumina paired-end sequencing, this value refers to the sum of read 1 and read 2. <sup>4</sup> Total read count after cleaning by FastQC. <sup>5</sup> GC content ratio of clean reads. <sup>6</sup> AT content ratio of clean reads. <sup>7</sup> Ratio of bases with phred quality score >20. <sup>8</sup> Ratio of bases with phred quality score >30.

**Table S3.** Statistics of clean reads mapped onto reference genome.

| Time (day) | Sample | Number of Mapped Reads | Percentage of Mapped Reads (%) | Number of Uniquely Mapped Reads | Percentage of Uniquely Mapped Reads (%) |
|------------|--------|------------------------|--------------------------------|---------------------------------|-----------------------------------------|
| 1          | PBS 1  | 98,986,537             | 87.2                           | 90,744,204                      | 80.0                                    |
|            | PBS 2  | 64,278,162             | 87.6                           | 59,266,630                      | 80.8                                    |
|            | AV     | 87,578,166             | 88.2                           | 80,182,679                      | 80.8                                    |
| 3          | PBS 1  | 66,021,957             | 87.5                           | 60,649,197                      | 80.4                                    |
|            | PBS 2  | 68,139,289             | 86.7                           | 62,864,439                      | 80.0                                    |
|            | AV     | 84,077,029             | 86.9                           | 76,840,919                      | 79.4                                    |
| 5          | PBS 1  | 75,523,041             | 87.6                           | 69,638,263                      | 80.8                                    |
|            | PBS 2  | 83,154,279             | 87.1                           | 76,600,416                      | 80.2                                    |
|            | AV     | 76,916,458             | 87.2                           | 70,654,311                      | 80.1                                    |

**Table S4.** Comparative analysis of DEG between PBS and AV. a: Total number of DEGs in PBS and AV, b: AV is upregulated compared to PBS, c: AV is downregulated compared to PBS.

| Time (day) | Group 1 | Group 2 | Number of genes    |                 |                   |
|------------|---------|---------|--------------------|-----------------|-------------------|
|            |         |         | Total <sup>a</sup> | Up <sup>b</sup> | Down <sup>c</sup> |
| 1          | Control | AV      | 862                | 430             | 432               |
| 3          |         |         | 492                | 204             | 288               |
| 5          |         |         | 741                | 270             | 471               |

**Table S5.** Top 10 nodes for PPI network centrality analysis of immune-related DEGs. At days 1 (A), 3 (B) and 5 (C), 59, 21, and 21 genes are selected for network display with weight score of >0.25 in a total of 8 immune-related KEGG pathways.

| Time (day) | Node name | Closeness Centrality | Betweenness Centrality | Degree |
|------------|-----------|----------------------|------------------------|--------|
| 1          | TNF       | 0.8704               | 0.3147                 | 40     |
|            | IL1B      | 0.8246               | 0.2062                 | 37     |
|            | MMP9      | 0.6912               | 0.0909                 | 27     |
|            | OCLN      | 0.5465               | 0.0435                 | 10     |
|            | C3        | 0.5663               | 0.0381                 | 15     |
|            | MMP14     | 0.5529               | 0.0310                 | 11     |
|            | MAG       | 0.5054               | 0.0278                 | 5      |
|            | IL12β     | 0.4947               | 0.0251                 | 5      |
|            | SERPINE1  | 0.5875               | 0.0218                 | 15     |
|            | CFH       | 0.5281               | 0.0209                 | 9      |
| 3          | TNF       | 1.0000               | 0.2212                 | 18     |
|            | IL1B      | 1.0000               | 0.2212                 | 18     |
|            | PTPRC     | 0.7500               | 0.0376                 | 12     |
|            | B2M       | 0.7500               | 0.0324                 | 12     |

|   |          |        |        |    |
|---|----------|--------|--------|----|
| 5 | CASP1    | 0.7200 | 0.0322 | 11 |
|   | ITGB1    | 0.6923 | 0.0307 | 10 |
|   | CALR     | 0.6429 | 0.0088 | 8  |
|   | PYCARD   | 0.6207 | 0.0075 | 7  |
|   | CD2      | 0.6429 | 0.0050 | 8  |
|   | HSP90AA1 | 0.6429 | 0.0046 | 8  |
|   | TNF      | 0.9048 | 0.3086 | 17 |
|   | C3       | 0.7308 | 0.0849 | 12 |
|   | F3       | 0.7037 | 0.0657 | 11 |
|   | CCL4     | 0.7308 | 0.0562 | 12 |
|   | CXCL12   | 0.7037 | 0.0430 | 11 |
|   | CCL19    | 0.6552 | 0.0371 | 10 |
|   | C3AR1    | 0.6129 | 0.0296 | 7  |
|   | A2M      | 0.6333 | 0.0242 | 8  |
|   | CCR7     | 0.6333 | 0.0172 | 9  |
|   | IL1R1    | 0.6552 | 0.0149 | 9  |

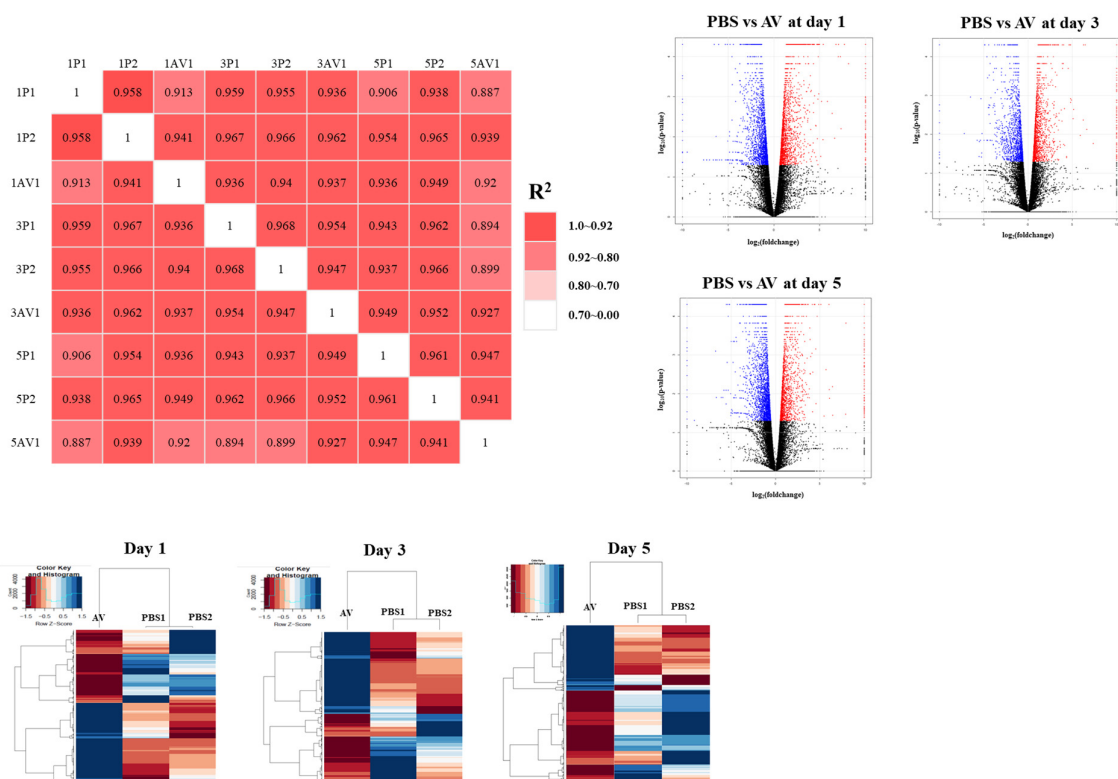

**Figure S1. Quality assessment and comparisons of transcriptome data quality between PBS and AV groups.** A) Correlation matrix of the transcriptome data of all samples. B) Volcano plot of differentially expressed genes (DEGs) distribution in the PBS vs AV pairwise comparisons. C) Hierarchical cluster analysis of gene expression profiles in the PBS vs AV.
